# Supplementary material
Source: publisher figshare collection journal article supplement (https://asha.figshare.com/articles/dataset/_/12735785)
Supplement: Supplementary file [file 1]

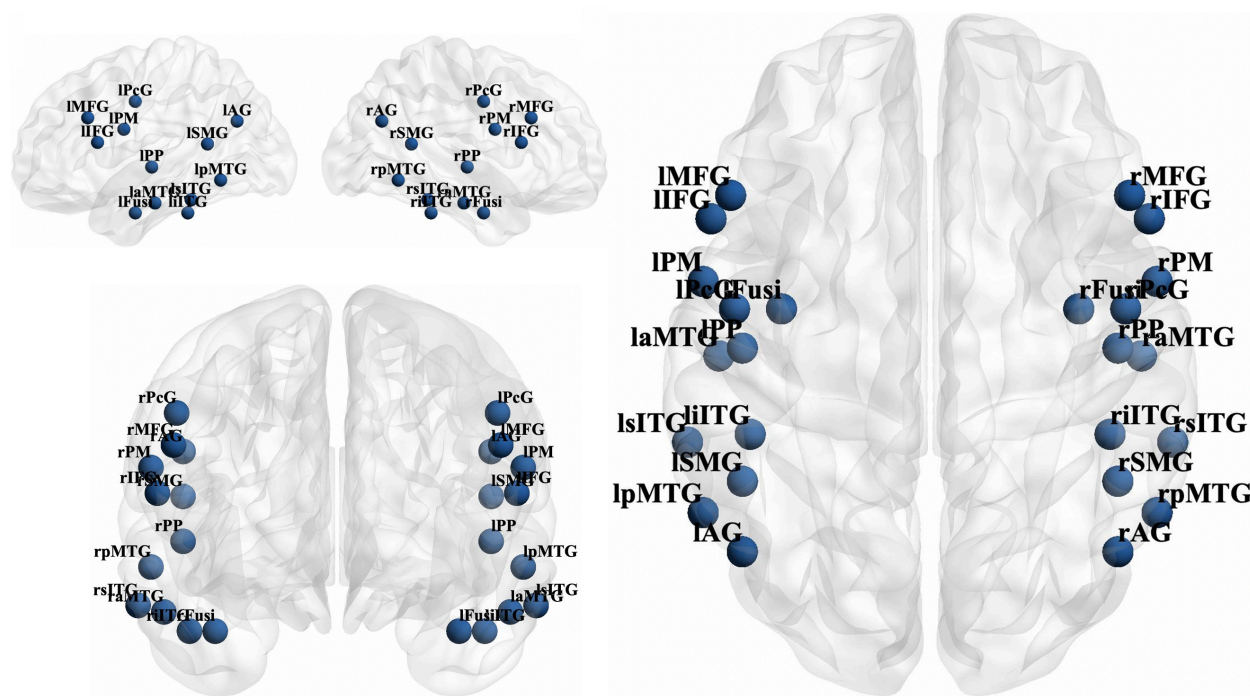

**Supplemental Material S1.** Region of interest (ROI) maps in the lateral (top left), coronal (bottom left), and axial (right) views.

l: left, r: right, aMTG: anterior middle temporal gyrus, sITG: superior inferior temporal gyrus, iITG: inferior inferior temporal gyrus, Fusi: fusiform gyrus, AG: angular gyrus, PP: planum polare, SMG: supramarginal gyrus, pMTG: posterior middle temporal gyrus, PM: premotor cortex, IFG: inferior frontal gyrus, MFG: middle frontal gyrus.
