# Supplementary material
Source: publisher figshare collection journal article supplement (https://asha.figshare.com/articles/dataset/_/12735785)
Supplement: Supplementary file [file 1]

|                               | <b>Connection</b> | <b>PWA</b>  |           | <b>HC</b>   |           |
|-------------------------------|-------------------|-------------|-----------|-------------|-----------|
|                               |                   | <b>Mean</b> | <b>SD</b> | <b>Mean</b> | <b>SD</b> |
| <i>Present in Both Groups</i> | lAG-lsITG         | .26         | .28       | .29         | .35       |
|                               | lAG-rAG           | .51         | .34       | .63         | .33       |
|                               | laMTG-lpSMG       | .16         | .25       | .29         | .22       |
|                               | lFusi-rAG         | -.10        | .17       | -.06        | .14       |
|                               | lFusi-rFusi       | .13         | .24       | .18         | .20       |
|                               | liITG-riITG       | .40         | .27       | .53         | .29       |
|                               | lMFG-rMFG         | .18         | .30       | .47         | .24       |
|                               | lPcG-lpIFG        | .15         | .20       | .21         | .29       |
|                               | lPcG-lPM          | .32         | .31       | .34         | .26       |
|                               | lpIFG-lMFG        | .21         | .23       | .25         | .24       |
|                               | lpIFG-rpIFG       | .16         | .24       | .32         | .27       |
|                               | lPM-lpIFG         | .24         | .26       | .13         | .17       |
|                               | lPM-rPM*          | .27         | .32       | .60         | .32       |
|                               | lpMTG-lsITG       | .23         | .30       | .22         | .19       |
|                               | lPP-rPP           | .32         | .31       | .59         | .31       |
|                               | lPP-rSMG          | .16         | .27       | .06         | .18       |
|                               | lpSMG_lAG         | .29         | .31       | .34         | .39       |
|                               | lpSMG_lpMTG       | .28         | .29       | .25         | .25       |
|                               | lpSMG-rSMG        | .22         | .25       | .48         | .20       |
|                               | lsITG-lMFG        | .18         | .22       | .19         | .19       |
|                               | lsITG-riITG       | .09         | .18       | .08         | .17       |
|                               | lsITG-rMFG        | .15         | .19       | .11         | .19       |
|                               | rAG-liITG         | -.12        | .20       | -.17        | .20       |
|                               | rAG-rPcG          | -.16        | .19       | -.10        | .20       |
|                               | raMTG_riITG       | .10         | .22       | .16         | .22       |
|                               | raMTG-rSMG        | .20         | .21       | .19         | .24       |
|                               | rPcG-lPcG         | .26         | .35       | .60         | .34       |
|                               | rPcG-lPM          | .28         | .32       | .38         | .37       |
|                               | rPcG-rPM          | .46         | .27       | .40         | .30       |
|                               | rpIFG-rMFG        | .31         | .28       | .38         | .26       |
|                               | rpMTG-lpMTG       | .22         | .32       | .27         | .20       |
|                               | rpMTG-rpIFG       | .16         | .24       | .15         | .26       |
|                               | rsITG-lMFG        | .17         | .19       | .04         | .24       |
|                               | rsITG-lsITG       | .29         | .36       | .46         | .21       |
|                               | rsITG-rMFG        | .27         | .29       | .09         | .24       |
|                               | rSMG-rpMTG        | .27         | .26       | .25         | .19       |

|                            |             |      |     |      |     |
|----------------------------|-------------|------|-----|------|-----|
| <i>Present Only in HC</i>  | lAG-rPcG    | -.10 | .21 | -.15 | .17 |
|                            | liITG-lpIFG | -.08 | .19 | -.06 | .16 |
|                            | lPcG-rPM    | .16  | .27 | .33  | .22 |
|                            | lpIFG-rMFG  | .09  | .23 | .29  | .29 |
|                            | lpMTG-lpIFG | .09  | .26 | .28  | .27 |
|                            | lpMTG-rsITG | .13  | .27 | .18  | .24 |
|                            | lPP-liITG   | -.11 | .17 | -.13 | .14 |
|                            | rAG_lsITG   | .16  | .21 | .11  | .30 |
|                            | raMTG-laMTG | .31  | .27 | .53  | .25 |
|                            | rFusi-riITG | .07  | .19 | .15  | .18 |
|                            | rPM-lpIFG   | .08  | .19 | .09  | .12 |
|                            | rpMTG-lPM   | -.11 | .24 | -.09 | .20 |
|                            | rpMTG-rsITG | .11  | .27 | .18  | .21 |
|                            | rPP-rsITG   | -.11 | .17 | -.14 | .22 |
|                            | rsITG-liITG | .06  | .27 | .25  | .23 |
|                            | rSMG_lsITG  | -.11 | .18 | -.15 | .22 |
| <i>Present Only in PWA</i> | laMTG-lFusi | .12  | .19 | .09  | .20 |
|                            | lFusi_riITG | .11  | .19 | .09  | .13 |
|                            | lFusi-lAG   | -.09 | .12 | -.06 | .14 |
|                            | lPcG-lMFG   | .10  | .17 | .16  | .27 |
|                            | rPM-rpIFG   | .10  | .23 | .09  | .17 |

\* HC > PWA,  $p < .05$  (FDR corrected).

**Supplemental Material S3.** Means and standard deviations (SD) for the connectivity strength of each ROI-ROI connection.

Laterality: r = right, l = left. sITG: superior inferior temporal gyrus, iITG: inferior inferior temporal gyrus, Fusi: fusiform gyrus, AG: angular gyrus, PP: planum polare, SMG: supramarginal gyrus, pMTG: posterior middle temporal gyrus, PM: premotor cortex, IFG: inferior frontal gyrus, MFG: middle frontal gyrus.
