# Supplementary material
Source: publisher figshare collection journal article supplement (https://asha.figshare.com/articles/dataset/_/12735785)
Supplement: Supplementary file [file 1]

| <i>WAB-R Score</i>            | <i>Omnibus Test</i>                                              | <i>Laterality</i> | <i>Parameter Estimates</i> |               |             | <i>95% Wald Confidence Interval</i> |              | <i>Hypothesis Test</i> |             |
|-------------------------------|------------------------------------------------------------------|-------------------|----------------------------|---------------|-------------|-------------------------------------|--------------|------------------------|-------------|
|                               |                                                                  |                   | Parameter                  | $\beta$       | Std. Error  | Lower                               | Upper        | Wald $\chi^2$          | <i>p</i>    |
| <i>Aphasia Quotient</i>       | $\chi^2(3, N = 48) = 27.87, p < .0001$<br>AIC = 250<br>BIC = 257 | <b>R</b>          | (Intercept)                | 99.55         | 3.78        | 92.14                               | 106.96       | 693.54                 | .000        |
|                               |                                                                  |                   | <b>Lesion Volume</b>       | <b>-.14</b>   | <b>.03</b>  | <b>-.19</b>                         | <b>-.09</b>  | <b>26.66</b>           | <b>.000</b> |
|                               |                                                                  |                   | <b>AOS Severity</b>        | <b>-5.34</b>  | <b>1.51</b> | <b>-8.31</b>                        | <b>-2.38</b> | <b>12.45</b>           | <b>.000</b> |
|                               |                                                                  |                   | <b>rpMTG-rIFG</b>          | <b>-22.64</b> | <b>8.42</b> | <b>-39.15</b>                       | <b>-6.13</b> | <b>7.22</b>            | <b>.007</b> |
|                               |                                                                  |                   | (Scale)                    | 175.42        | 45.29       | 105.75                              | 29.97        |                        |             |
| <i>Spontaneous Speech</i>     | $\chi^2(2, N = 48) = 24.38, p < .0001$<br>AIC = 162<br>BIC=168   |                   | (Intercept)                | 18.98         | .97         | 17.87                               | 2.87         | 385.17                 | .000        |
|                               |                                                                  |                   | <b>Lesion Volume</b>       | <b>-.03</b>   | <b>.01</b>  | <b>-.04</b>                         | <b>-.02</b>  | <b>22.73</b>           | <b>.000</b> |
|                               |                                                                  |                   | <b>AOS Severity</b>        | <b>-1.32</b>  | <b>.32</b>  | <b>-1.95</b>                        | <b>-.69</b>  | <b>16.88</b>           | <b>.000</b> |
|                               |                                                                  |                   | (Scale)                    | 1.04          | 2.59        | 6.05                                | 16.65        |                        |             |
| <i>Content</i>                | $\chi^2(4, N = 48) = 28.79, p < .0001$<br>AIC = 128<br>BIC = 136 | <b>B</b>          | (Intercept)                | 3.90          | 2.31        | -.64                                | 8.43         | 2.83                   | .092        |
|                               |                                                                  |                   | <b>Lesion Volume</b>       | <b>-.02</b>   | <b>.00</b>  | <b>-.03</b>                         | <b>-.01</b>  | <b>2.62</b>            | <b>.000</b> |
|                               |                                                                  |                   | <b>AOS Severity</b>        | <b>-.56</b>   | <b>.18</b>  | <b>-.92</b>                         | <b>-.20</b>  | <b>9.32</b>            | <b>.002</b> |
|                               |                                                                  |                   | <b>Age</b>                 | <b>.09</b>    | <b>.04</b>  | <b>.03</b>                          | <b>.16</b>   | <b>7.11</b>            | <b>.008</b> |
|                               |                                                                  |                   | <b>IFusi-riITG</b>         | <b>3.96</b>   | <b>1.28</b> | <b>1.44</b>                         | <b>6.47</b>  | <b>9.48</b>            | <b>.002</b> |
| <i>Fluency</i>                | $\chi^2(3, N = 48) = 2.91, p < .0001$<br>AIC = 128<br>BIC = 135  |                   | (Intercept)                | 8.78          | .59         | 7.60                                | 9.92         | 221.11                 | .000        |
|                               |                                                                  |                   | <b>Lesion Volume</b>       | <b>-.01</b>   | <b>.00</b>  | <b>-.02</b>                         | <b>-.01</b>  | <b>14.97</b>           | <b>.000</b> |
|                               |                                                                  |                   | <b>AOS Severity</b>        | <b>-.72</b>   | <b>.15</b>  | <b>-1.02</b>                        | <b>-.42</b>  | <b>22.17</b>           | <b>.000</b> |
|                               |                                                                  |                   | (Scale)                    | 3.05          | .79         | 1.84                                | 5.07         |                        |             |
| <i>Auditory Comprehension</i> | $\chi^2(2, N = 48) = 19.49, p < .0001$<br>AIC=106                | <b>B</b>          | (Intercept)                | 6.51          | .53         | 5.46                                | 7.55         | 149.09                 | .000        |
|                               |                                                                  |                   | <b>lAG-rAG</b>             | <b>2.11</b>   | <b>.77</b>  | <b>.60</b>                          | <b>3.62</b>  | <b>7.49</b>            | <b>.006</b> |

|                                | BIC = 111                               | L | IAG-lsITG<br>(Scale)    | 2.75<br>1.53         | .75<br>.39         | 1.28<br>.92          | 4.22<br>2.54         | 13.37        | .000        |
|--------------------------------|-----------------------------------------|---|-------------------------|----------------------|--------------------|----------------------|----------------------|--------------|-------------|
| <i>Repetition</i>              | $\chi^2(2, N = 48) = 16.45, p < .0001$  |   | (Intercept)             | 9.64                 | .63                | 8.41                 | 1.86                 | 236.38       | .000        |
|                                | AIC = 143                               |   | Lesion Volume           | -.01                 | .01                | -.02                 | .00                  | 1.88         | .171        |
|                                | BIC = 149                               |   | AOS Severity<br>(Scale) | <b>-.96</b><br>5.29  | <b>.24</b><br>1.36 | <b>-1.43</b><br>3.19 | <b>-.49</b><br>8.77  | <b>16.02</b> | <b>.000</b> |
|                                |                                         |   |                         |                      |                    |                      |                      |              |             |
| <i>Naming and Word Finding</i> | $\chi^2(4, N = 48) = 33.956, p < .0001$ |   | (Intercept)             | 11.35                | .58                | 1.21                 | 12.50                | 379.23       | .000        |
|                                | AIC = 121                               |   | Lesion Volume           | <b>-.02</b>          | <b>.00</b>         | <b>-.02</b>          | <b>-.01</b>          | <b>27.55</b> | <b>.000</b> |
|                                | BIC = 130                               |   | AOS Severity            | <b>-.45</b>          | <b>.15</b>         | <b>-.73</b>          | <b>-.16</b>          | <b>9.05</b>  | <b>.003</b> |
|                                |                                         | R | rpMTG-rIFG              | <b>-3.66</b>         | <b>1.22</b>        | <b>-6.04</b>         | <b>-1.27</b>         | <b>9.02</b>  | <b>.003</b> |
|                                |                                         | L | lIFG-lMFG<br>(Scale)    | <b>-4.28</b><br>2.23 | <b>.87</b><br>.58  | <b>-5.98</b><br>1.35 | <b>-2.57</b><br>3.70 | <b>24.20</b> | <b>.000</b> |

\*  $p < .05$  (FDR corrected)

**Supplemental Material S5.** Generalized linear model results for the best fit models. Significant predictors are in **bold**. Model fit statistics (Akaike's Information Criterion [AIC] and Bayesian Information Criterion [BIC]) are provided for each model. The normal distribution produced the best fit model for all analyses.

Laterality: B = bilateral, R = right, L = left. AOS: apraxia of speech, l: left, r: right, sITG: superior inferior temporal gyrus, iITG: inferior inferior temporal gyrus, Fusi: fusiform gyrus, AG: angular gyrus, PP: planum polare, SMG: supramarginal gyrus, pMTG: posterior middle temporal gyrus, PM: premotor cortex, IFG: inferior frontal gyrus, MFG: middle frontal gyrus.
