# Supplementary material
Source: publisher figshare collection journal article supplement (https://asha.figshare.com/articles/dataset/_/12735785)
Supplement: Supplementary file [file 1]

| <i>Western Aphasia Batter Standard Score</i> |      |      |       |        |        |         |         |       |        |        |
|----------------------------------------------|------|------|-------|--------|--------|---------|---------|-------|--------|--------|
|                                              | Age  | Educ | AOS   | AQ     | SS     | Fluency | Content | AC    | Rep    | N/WF   |
| Age                                          |      |      |       | .09    | .04    | .01     | .10     | .11   | .15    | .02    |
| Sex                                          |      |      |       | .18    | .23    | .21     | .28     | .02   | .10    | .19    |
| Months Post Onset                            |      |      |       | .05    | .01    | -.06    | .05     | .05   | .01    | -.03   |
| Education                                    |      |      |       | -.11   | -.08   | -.03    | -.15    | -.04  | -.00   | -.19   |
| AOS                                          |      |      |       | -.54** | -.51** | -.61**  | -.45*   | -.13  | -.57** | -.52** |
| Severity                                     |      |      |       |        |        |         |         |       |        |        |
| Lesion                                       |      |      |       | -.59** | -.61** | -.52**  | -.62**  | -.44* | -.35   | -.58** |
| Volume                                       |      |      |       |        |        |         |         |       |        |        |
| raMTG-laMTG                                  | .28  | .31  | -.07  | .23    | .23    | .18     | .23     | .23   | .15    | .15    |
| raMTG-rSMG                                   | -.11 | -.33 | .01   | -.21   | -.27   | -.10    | -.38    | -.19  | -.02   | -.21   |
| raMTG-riITG                                  | -.51 | -.11 | .04   | -.19   | -.22   | -.11    | -.29    | -.02  | -.13   | -.19   |
| laMTG-latFusi                                | -.08 | -.10 | -.14  | .18    | .21    | .06     | .32     | .01   | .07    | .26    |
| laMTG-lpSMG                                  | -.21 | .20  | .25   | .07    | .04    | .05     | .02     | .31   | .07    | -.06   |
| latFusi-ratFusi                              | .34  | -.10 | -.14  | .21    | .23    | .23     | .19     | .20   | .07    | .20    |
| latFusi-lAG                                  | -.23 | -.10 | -.22  | -.20   | -.11   | -.10    | -.09    | -.33  | -.13   | -.20   |
| latFusi-rAG                                  | .02  | -.06 | -.22  | -.03   | -.05   | -.07    | -.02    | -.13  | .09    | -.06   |
| latFusi-riITG                                | -.38 | -.28 | -.21  | .18    | .20    | .11     | .25     | -.26  | .20    | .29    |
| ratFusi-riITG                                | -.17 | .14  | -.28  | .18    | .24    | .15     | .28     | -.03  | .02    | .28    |
| IPP-rPP                                      | .39  | .08  | -.51* | .42    | .38    | .34     | .35     | .07   | .45    | .37    |
| IPP-rSMG                                     | -.10 | -.12 | -.30  | .14    | .12    | .05     | .16     | .10   | .06    | .19    |
| IPP-liITG                                    | -.33 | .03  | .21   | -.14   | -.10   | -.13    | -.05    | .09   | -.13   | -.27   |
| rPP-rsITG                                    | -.32 | .23  | .21   | -.05   | -.21   | -.17    | -.21    | .12   | .04    | .04    |
| lpSMG-rSMG                                   | .02  | -.08 | -.34  | .23    | .24    | .13     | .29     | .05   | .31    | .07    |

|             |      |      |      |      |      |       |      |      |       |      |
|-------------|------|------|------|------|------|-------|------|------|-------|------|
| lpSMG-lAG   | -.24 | .09  | .50* | -.34 | -.36 | -.47* | -.18 | .03  | -.44* | -.17 |
| lpSMG-lpMTG | .03  | .37  | -.10 | .25  | .23  | .21   | .20  | .26  | .21   | .16  |
| rSMG-rpMTG  | -.11 | -.11 | .06  | -.24 | -.25 | -.29  | -.16 | -.43 | -.07  | -.16 |
| rMSG-lsITG  | -.20 | -.04 | .27  | -.34 | -.17 | -.30  | -.01 | -.32 | -.50* | -.17 |
| lAG-rAG     | .07  | .12  | .00  | .11  | .02  | -.03  | .06  | .38  | .15   | -.05 |
| lAG-rPcG    | .08  | -.18 | .03  | -.01 | .02  | -.02  | .04  | .03  | -.02  | -.05 |
| lAG-lsITG   | .09  | .01  | -.02 | .26  | .22  | .22   | .18  | .50* | .18   | .09  |
| rAG-rPcG    | -.23 | -.15 | .35  | -.30 | -.33 | -.29  | -.30 | -.14 | -.25  | -.17 |
| rAG-lsITG   | -.01 | -.33 | -.20 | .19  | .21  | .11   | .26  | .11  | .19   | .08  |
| rAG-liITG   | -.26 | -.30 | .16  | -.41 | -.29 | -.24  | -.28 | -.37 | -.46* | -.25 |
| rpMTG-lpMTG | .02  | .08  | .13  | -.06 | -.11 | -.12  | -.07 | .19  | .02   | -.20 |
| rpMTG-rsITG | .03  | .11  | .10  | -.15 | -.15 | -.25  | -.02 | .23  | -.17  | -.25 |
| rpMTG-PM    | -.38 | -.17 | .24  | -.02 | .07  | .02   | .10  | -.14 | -.12  | .07  |
| rpMTG-rpIFG | .05  | .41  | .19  | -.39 | -.38 | -.41  | -.28 | -.21 | -.17  | -.49 |
| lpMTG-rsITG | .14  | -.03 | -.08 | .05  | -.08 | -.13  | -.01 | .34  | .13   | -.06 |
| lpMTG-lsITG | -.35 | .20  | .25  | -.21 | -.21 | -.32  | -.06 | .22  | -.31  | -.23 |
| lpMTG-lpIFG | .25  | .15  | -.04 | .16  | .12  | .13   | .09  | .19  | .26   | -.02 |
| rPcG-lPcG   | .09  | .11  | -.43 | .24  | .28  | .23   | .28  | -.11 | .19   | .29  |
| rPcG-lPM    | .32  | -.05 | -.31 | .12  | .22  | .20   | .20  | -.21 | .17   | .00  |
| rPcG-rPM    | .07  | .01  | -.31 | .11  | .07  | .02   | .10  | .16  | .15   | .00  |
| lPcG-lPM    | .28  | .00  | -.13 | .33  | .31  | .39   | .17  | .05  | .30   | .33  |
| lPcG-rPM    | -.02 | .01  | -.37 | .13  | .07  | .05   | .07  | .14  | .09   | .18  |
| lPcG-lpIFG  | .12  | .16  | .12  | .11  | .07  | .01   | .10  | .19  | .04   | .13  |
| lPcG-lMFG   | -.09 | .16  | .03  | .02  | -.07 | -.10  | -.03 | .12  | -.01  | .14  |
| rsITG-lsITG | -.02 | -.01 | .04  | .07  | .04  | .14   | -.07 | .12  | .21   | -.13 |

|             |      |       |       |      |      |      |      |       |      |       |
|-------------|------|-------|-------|------|------|------|------|-------|------|-------|
| rsITG-liITG | -.06 | .29   | -.09  | .04  | .09  | .11  | .05  | -.03  | .05  | -.03  |
| rsITG-IMFG  | .11  | .16   | -.06  | -.13 | -.14 | -.34 | .08  | -.03  | -.05 | -.20  |
| rsITG-rMFG  | -.14 | -.01  | .04   | -.19 | -.16 | -.28 | -.01 | -.14  | -.22 | -.11  |
| lsITG-riITG | .31  | .16   | -.34  | .18  | .11  | .15  | .05  | -.08  | .30  | .17   |
| lsITG-IMFG  | .37  | .10   | -.20  | .19  | .06  | .07  | .05  | .29   | .32  | .05   |
| lsITG-rMFG  | -.08 | -.45* | -.17  | .10  | .11  | .04  | .15  | -.10  | .22  | -.02  |
| liITG-riITG | -.37 | .15   | .23   | -.22 | -.31 | -.16 | -.39 | .04   | -.11 | -.22  |
| liITG-lpIFG | .17  | .12   | .06   | .09  | .10  | .07  | .11  | -.14  | .15  | .06   |
| IPM-rPM     | .17  | -.13  | -.54* | .22  | .23  | .22  | .19  | .00   | .20  | .21   |
| IPM-lpIFG   | -.39 | .11   | .53*  | -.21 | -.14 | -.11 | -.15 | .11   | -.44 | -.08  |
| rPM-lpIFG   | .02  | -.07  | -.12  | .09  | .19  | .25  | .10  | .00   | -.02 | .04   |
| rPM-rpIFG   | -.31 | .08   | -.02  | -.03 | -.17 | -.02 | -.28 | .27   | .03  | -.03  |
| lpIFG-rpIFG | .04  | -.08  | -.39  | -.14 | -.07 | -.03 | -.10 | -.49* | .06  | -.15  |
| lpIFG-IMFG  | -.19 | .22   | .23   | -.41 | -.37 | -.29 | -.38 | -.30  | -.17 | -.53* |
| lpIFG-rMFG  | -.12 | .12   | .16   | -.40 | -.37 | -.30 | -.36 | -.33  | -.30 | -.32  |
| rpIFG-rMFG  | .02  | .07   | -.08  | -.09 | -.01 | .09  | -.11 | -.23  | .09  | -.28  |
| IMFG-rMFG   | -.11 | .07   | -.14  | -.07 | -.04 | -.05 | -.02 | -.17  | .09  | -.21  |

**Supplemental Material S2.** Partial correlations controlled for lesion volume, months post onset of stroke, and sex. \*  $p < .05$ , \*\*  $p < .001$ .

AOS: apraxia of speech, AQ: aphasia quotient, SS: Spontaneous Speech, AC: Auditory Comprehension, Rep: Repetition, N/WF: Naming and Word Finding.

l: left, r: right, aMTG: anterior middle temporal gyrus, sITG: superior inferior temporal gyrus, iITG: inferior inferior temporal gyrus, Fusi: fusiform gyrus, AG: angular gyrus, PP: planum polare, SMG: supramarginal gyrus, pMTG: posterior middle temporal gyrus, PM: premotor cortex, PcG: precentral gyrus, IFG: inferior frontal gyrus, MFG: middle frontal gyrus.
