# Supplementary material
Source: publisher figshare collection journal article supplement (https://asha.figshare.com/articles/dataset/_/12735785)
Supplement: Supplementary file [file 1]

| WAB-R Score          | Omnibus Test           | Laterality           | Parameter Estimates                    |                        |                   | 95% Wald CI                             |              | Hypothesis Test |              |              |            |
|----------------------|------------------------|----------------------|----------------------------------------|------------------------|-------------------|-----------------------------------------|--------------|-----------------|--------------|--------------|------------|
|                      |                        |                      | Parameter                              | $\beta$                | Std. Error        | Lower                                   | Upper        | Wald $\chi^2$   | $p$          |              |            |
| Aphasia Quotient     | AIC = 252<br>BIC = 264 |                      | $X^2(6, N = 48) = 31.07$ ,<br>p = .001 | (Intercept)            | 91.51             | 7.81                                    | 76.20        | 106.83          | 137.17       | .00          |            |
|                      |                        |                      | <b>Lesion Volume</b>                   | <b>-.11</b>            | <b>.02</b>        | <b>-.15</b>                             | <b>-.06</b>  | <b>21.52</b>    | <b>.00</b>   |              |            |
|                      |                        |                      | <b>AOS Severity</b>                    | <b>-5.03</b>           | <b>1.73</b>       | <b>-8.43</b>                            | <b>-1.64</b> | <b>8.43</b>     | <b>.01</b>   |              |            |
|                      |                        |                      | Both groups                            | B                      | lPP-rPP           | 16.37                                   | 1.23         | -3.67           | 36.41        | 2.56         | .15        |
|                      |                        |                      | Both groups                            | <b>R</b>               | <b>rpMTG-rIFG</b> | <b>-25.60</b>                           | <b>8.82</b>  | <b>-42.89</b>   | <b>-8.31</b> | <b>8.42</b>  | <b>.01</b> |
|                      |                        |                      | Both groups                            | B                      | lPM-rPM           | -9.36                                   | 8.10         | -25.24          | 6.51         | 1.34         | .25        |
|                      |                        |                      |                                        |                        |                   | 11.2                                    |              |                 |              |              |            |
|                      |                        |                      | Both groups                            | B                      | lsITG-rMFG        | 12.88                                   | 0            | -9.09           | 34.84        | 1.32         | .25        |
|                      |                        |                      | 157.6                                  |                        |                   |                                         |              |                 |              |              |            |
|                      |                        |                      | (Scale)                                | 4                      | 4.70              | 95.04                                   | 261.49       |                 |              |              |            |
| Spontaneous Speech   | AIC = 166<br>BIC = 183 |                      | $X^2(10, N = 48) = 36.61$ , p < .0001  | (Intercept)            | 16.92             | 2.67                                    | 11.68        | 22.16           | 4.03         | .00          |            |
|                      |                        |                      | <b>Lesion Volume</b>                   | <b>-.03</b>            | <b>.01</b>        | <b>-.04</b>                             | <b>-.01</b>  | <b>12.67</b>    | <b>.00</b>   |              |            |
|                      |                        |                      | AOS Severity                           | -.49                   | .40               | -1.27                                   | .30          | 1.48            | .27          |              |            |
|                      |                        |                      | Gender                                 | .06                    | 1.50              | -2.88                                   | 2.99         | .00             | .97          |              |            |
|                      |                        |                      | Both groups                            | B                      | lPM-rPM           | 2.63                                    | 2.60         | -2.46           | 7.72         | 1.03         | .34        |
|                      |                        |                      | Both groups                            | R                      | rsITG-rMFG        | -4.07                                   | 2.57         | -9.11           | .97          | 2.51         | .21        |
|                      |                        |                      | PWA only                               | R                      | rPM-rIFG          | -3.10                                   | 1.74         | -6.51           | .31          | 3.18         | .16        |
|                      |                        |                      | PWA only                               | B                      | lIFG-rMFG         | -7.55                                   | 4.11         | -15.60          | .51          | 3.38         | .16        |
|                      |                        |                      | Both groups                            | B                      | lMFG-rMFG         | 3.93                                    | 2.91         | -1.78           | 9.64         | 1.82         | .27        |
|                      |                        |                      | Both groups                            | B                      | lPP-rPP           | 2.23                                    | 1.77         | -1.25           | 5.70         | 1.58         | .27        |
|                      |                        |                      | Both groups                            | R                      | rpMTG-rIFG        | -4.36                                   | 2.27         | -8.80           | .09          | 3.69         | .16        |
|                      |                        |                      |                                        |                        | (Scale)           | 6.68                                    | 1.72         | 4.03            | 11.08        |              |            |
|                      |                        |                      | Content                                | AIC = 131<br>BIC = 143 |                   | $X^2(7, N = 48) = 32.14$ ,<br>p < .0001 | (Intercept)  | 3.27            | 2.32         | -1.28        | 7.81       |
| <b>Lesion Volume</b> | <b>-.02</b>            | <b>.01</b>           |                                        |                        |                   | <b>-.03</b>                             | <b>-.01</b>  | <b>21.78</b>    | <b>.00</b>   |              |            |
| <b>AOS Severity</b>  | <b>-.77</b>            | <b>.18</b>           |                                        |                        |                   | <b>-1.12</b>                            | <b>-.43</b>  | <b>19.43</b>    | <b>.00</b>   |              |            |
| <b>Age</b>           | <b>.13</b>             | <b>.04</b>           |                                        |                        |                   | <b>.05</b>                              | <b>.22</b>   | <b>9.10</b>     | <b>.01</b>   |              |            |
| Both groups          | B                      | lPM-rPM              |                                        |                        |                   | -1.83                                   | .98          | -3.75           | .10          | 3.46         | .10        |
| Both groups          | R                      | rsITG-rMFG           |                                        |                        |                   | .80                                     | 1.08         | -1.32           | 2.93         | .55          | .46        |
| Both groups          | B                      | lPP-rPP              |                                        |                        |                   | -1.72                                   | 1.39         | -4.45           | 1.00         | 1.54         | .24        |
| Both groups          | <b>B</b>               | <b>latFusi-riITG</b> |                                        |                        |                   | <b>5.28</b>                             | <b>1.42</b>  | <b>2.49</b>     | <b>8.07</b>  | <b>13.76</b> | <b>.00</b> |
|                      |                        | (Scale)              | 2.50                                   | .65                    | 1.51              | 4.15                                    |              |                 |              |              |            |
| Fluency              | AIC = 125              |                      | $X^2(10, N = 48) = 37.75$ , p < .0001  | (Intercept)            | 8.22              | 1.07                                    | 6.12         | 1.32            | 58.76        | .00          |            |
|                      |                        |                      | <b>Lesion Volume</b>                   | <b>-.01</b>            | <b>.00</b>        | <b>-.02</b>                             | <b>.00</b>   | <b>6.56</b>     | <b>.04</b>   |              |            |

|                         |  |          |                                          |              |             |              |              |              |            |
|-------------------------|--|----------|------------------------------------------|--------------|-------------|--------------|--------------|--------------|------------|
| BIC = 142               |  |          | AOS Severity                             | -.22         | .25         | -.71         | .27          | .75          | .42        |
|                         |  |          | Gender                                   | .30          | 1.01        | -1.69        | 2.28         | .09          | .77        |
| Both groups             |  | B        | IPM-rPM                                  | 2.20         | 1.23        | -.21         | 4.61         | 3.20         | .13        |
| Both groups             |  | L        | lpSMG_lAG                                | -1.25        | .88         | -2.97        | .47          | 2.04         | .21        |
| Both groups             |  | <b>B</b> | <b>rsITG-IMFG</b>                        | <b>-5.04</b> | <b>1.46</b> | <b>-7.89</b> | <b>-2.18</b> | <b>11.92</b> | <b>.01</b> |
| Both groups             |  | R        | rsITG-rMFG                               | -2.93        | 1.27        | -5.43        | -.44         | 5.31         | .06        |
| PWA only                |  | R        | rPM-rIFG                                 | -1.24        | .93         | -3.07        | .59          | 1.75         | .23        |
| PWA only                |  | B        | lIFG-rMFG                                | -3.76        | 1.93        | -7.54        | .02          | 3.81         | .11        |
| Both groups             |  | B        | IMFG-rMFG                                | 3.19         | 1.88        | -.49         | 6.87         | 2.88         | .14        |
|                         |  |          | (Scale)                                  | 1.72         | .44         | 1.04         | 2.85         |              |            |
| Auditory Comprehension  |  |          | $X^2(5, N = 48) = 29.78,$<br>$p < .0001$ |              |             |              |              |              |            |
| AIC = 102               |  |          | (Intercept)                              | 7.10         | .63         | 5.87         | 8.33         | 128.08       | .00        |
| BIC = 111               |  |          | Lesion Volume                            | .00          | .00         | -.01         | .00          | 1.39         | .24        |
| Both groups             |  | <b>B</b> | <b>IAG-rAG</b>                           | <b>2.16</b>  | <b>.90</b>  | <b>.40</b>   | <b>3.92</b>  | <b>5.79</b>  | <b>.03</b> |
| Both groups             |  | <b>L</b> | <b>IAG-lsITG</b>                         | <b>2.19</b>  | <b>.69</b>  | <b>.85</b>   | <b>3.54</b>  | <b>1.19</b>  | <b>.00</b> |
| Both groups             |  | R        | rpMTG-rIFG                               | -2.17        | 1.05        | -4.24        | -.11         | 4.25         | .06        |
| PWA only                |  | B        | lpMTG-rsITG                              | 1.47         | .82         | -.13         | 3.08         | 3.23         | .09        |
|                         |  |          | (Scale)                                  | 1.08         | .28         | .65          | 1.80         |              |            |
| Repetition              |  |          | $X^2(3, N = 48) = 17.92,$<br>$p < .0001$ |              |             |              |              |              |            |
| AIC = 144               |  |          | (Intercept)                              | 9.93         | .61         | 8.73         | 11.13        | 263.52       | .00        |
| BIC = 151               |  |          | Lesion Volume                            | -.01         | .01         | -.02         | .01          | 1.14         | .29        |
|                         |  |          | <b>AOS Severity</b>                      | <b>-.95</b>  | <b>.23</b>  | <b>-1.39</b> | <b>-.50</b>  | <b>17.36</b> | <b>.00</b> |
| Both groups             |  | R        | rsITG-rMFG                               | -1.84        | 1.03        | -3.87        | .18          | 3.19         | .10        |
|                         |  |          | (Scale)                                  | 5.03         | 1.30        | 3.03         | 8.35         |              |            |
| Naming and Word Finding |  |          | $X^2(5, N = 48) = 33.96,$<br>$p < .0001$ |              |             |              |              |              |            |
| AIC = 123               |  |          | (Intercept)                              | 11.37        | .90         | 9.61         | 13.14        | 159.86       | .00        |
| BIC = 133               |  |          | <b>Lesion Volume</b>                     | <b>-.02</b>  | <b>.00</b>  | <b>-.02</b>  | <b>-.01</b>  | <b>26.70</b> | <b>.00</b> |
|                         |  |          | <b>AOS Severity</b>                      | <b>-.45</b>  | <b>.17</b>  | <b>-.79</b>  | <b>-.11</b>  | <b>6.64</b>  | <b>.01</b> |
| Both groups             |  | <b>R</b> | <b>rpMTG-rIFG</b>                        | <b>-3.66</b> | <b>1.23</b> | <b>-6.08</b> | <b>-1.25</b> | <b>8.82</b>  | <b>.00</b> |
| Both groups             |  | <b>L</b> | <b>lIFG-IMFG</b>                         | <b>-4.28</b> | <b>.87</b>  | <b>-5.98</b> | <b>-2.58</b> | <b>24.31</b> | <b>.00</b> |
| Both groups             |  | B        | IPM-rPM                                  | -.04         | 1.10        | -2.20        | 2.12         | .00          | .97        |
|                         |  |          | (Scale)                                  | 2.23         | .58         | 1.35         | 3.70         |              |            |

**Supplemental Material S4.** Generalized linear model results for the first proposed model, based on the use of univariate linear models to identify potential predictors. Significant predictors are in **bold**. Model fit statistics (Akaike's Information Criterion [AIC] and Bayesian Information Criterion [BIC]) are provided for each model. Indicators of whether the functional connection was significant in both groups or the PWA group only, are provided in the column left of each potential predictor connection. The normal distribution produced the best fit model for all analyses.

Laterality: B = bilateral, R = right, L = left. AOS: apraxia of speech, l: left, r: right, sITG: superior inferior temporal gyrus, iITG: inferior inferior temporal gyrus, Fusi: fusiform gyrus, AG: angular gyrus, PP: planum polare, SMG: supramarginal gyrus, pMTG: posterior middle temporal gyrus, PM: premotor cortex, IFG: inferior frontal gyrus, MFG: middle frontal gyrus.
